# Supplementary figures and images for: Genetic covariance between indices of body condition and immunocompetence in a passerine bird
Source: Springer Nature journal article supplement (doi:10.1186/1471-2148-5-61), 2005-11-07

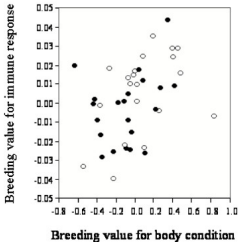

Supplement: 12862_2005_173_MOESM1_ESM.pdf [file 12862_2005_173_MOESM1_ESM.pdf]
